# Supplementary material for: Lithiophilic Sn–Co nano-seeds sealed in a hollow carbon shell to stabilize lithium metal anodes
Source: Royal Society of Chemistry journal article supplement (doi:10.1039/d2cc02932d), 2022-01-01
Supplement: d2cc02932d1.pdf [file d2cc02932d1.pdf]

## Supporting Information

### Lithiophilic Sn-Co nano-seeds sealed in hollow carbon shell to stabilize lithium metal anodes

Qiuping Li<sup>‡a</sup>, Jiaming Zhang<sup>‡a</sup>, Yaping Zeng<sup>a</sup>, Zheng Tang<sup>a</sup>, Dan Sun<sup>a</sup>, Zhiguang Peng<sup>\*a</sup>, Yougen Tang<sup>a,b</sup>, Huanhuan Li,<sup>c</sup> Haiyan Wang<sup>\*a,b</sup>

\*Corresponding author.

a. Hunan Provincial Key Laboratory of Chemical Power Sources, College of Chemistry and Chemical Engineering, Central South University, Changsha, 410083, P.R China. E-mail: wanghy419@csu.edu.cn; zhgpeng@csu.edu.cn.

b. Shenzhen Research Institute of Central South University, Shenzhen, 518057, P.R China.

c. School of Chemistry and Chemical Engineering, Henan Normal University, Xinxiang 453007, P. R. China.

<sup>‡</sup> These authors contributed equally to this work.

**Preparation of  $\text{CoSn}(\text{OH})_6$  nanocubes:** 1 mmol of stannic chloride hydrated ( $\text{SnCl}_4 \cdot 5\text{H}_2\text{O}$ ) was dissolved in 5 mL of ethanol (EA) (named as solution A). Besides, 1 mmol cobalt chloride hexahydrate ( $\text{CoCl}_2 \cdot 6\text{H}_2\text{O}$ ) and 0.294 g sodium citrate dihydrate ( $\text{C}_6\text{H}_5\text{Na}_3\text{O}_7 \cdot 2\text{H}_2\text{O}$ ) were dissolved in 20 mL deionized water (DIW) to obtain a homogeneous solution (named as solution B). 1.60 g sodium hydroxide (NaOH) was dissolved in 20 mL DIW to obtain a aqueous solution (named as solution C). Afterward, solution A was injected into solution B, forming a light pink turbid liquid, then followed by dropwise addition of solution C. After stirring for 1 h, 20 mL of NaOH solution with a high concentration of  $8 \text{ mol L}^{-1}$  was dropped in the above suspension liquid with successive stirring for 20 min. Finally,  $\text{CoSn}(\text{OH})_6$  precipitates were then separated by centrifugation, washed with DIW/EA several times and dried at  $80^\circ\text{C}$  for 12 h.

**Preparation of  $\text{CoSn}(\text{OH})_6$ @polydopamine (PDA) nanocubes:** 150 mg of the obtained  $\text{CoSn}(\text{OH})_6$  powder was added in a Tris-buffer (1.2114 g in 50 mL DIW + 50 mL EA) under ultrasonic dispersion for 20 min. Then, 200 mg dopamine hydrochloride powder was mixed, and the solution was kept stirring for 24 h. Finally, the black  $\text{CoSn}(\text{OH})_6$ @PDA powder was obtained after washing and drying in oven at  $80^\circ\text{C}$  for 12 h.

**Preparation of Sn-Co@C nanocubes:** The as-prepared  $\text{CoSn}(\text{OH})_6$ @PDA powder was annealed at  $650^\circ\text{C}$  (heating rate:  $2^\circ\text{C min}^{-1}$ ) under  $\text{H}_2(5\%)/\text{Ar}(95\%)$  atmosphere for 5 h. Then, the black Sn-Co@C powder was obtained.

**Preparation of Sn-Co@C nanocubes:** The Sn-Co sample preparation process is similar to Sn-Co@C, including  $\text{CoSn}(\text{OH})_6$  nanocubes preparation. The as-prepared  $\text{CoSn}(\text{OH})_6$  powder was annealed at  $650^\circ\text{C}$  (heating rate:  $2^\circ\text{C min}^{-1}$ ) under  $\text{H}_2(5\%)/\text{Ar}(95\%)$  atmosphere for 5 h. Then, the blue Sn-Co powder was obtained.

**Preparation of Sn-Co@C and Sn-Co on the Cu current collector:** Commercial Cu foil was used as substrate to prepare the Sn-Co@C current collectors. The obtained Sn-Co@C powder was mixed with PVDF (mass ratio: 9:1) in N-Methyl pyrrolidone (NMP) solvent. Afterwards, the slurry was coated on 2D Cu foil via doctor blade and dried at  $80^\circ\text{C}$  for 12 h. The mass loading of Sn-Co@C is about  $1 \text{ mg cm}^{-2}$ .

**Material characterization:** The morphologies and structures of materials were detected via scanning electron microscope (SEM, JEOL JSM-7610FPlus) and transmission electron microscopy (TEM, JEOL JEM-F200). Crystalline structures of samples were measured by X-ray diffraction (XRD, Rigaku-TTR III) with Cu-K  $\alpha$  radiation. The superficial elemental analyses of  $\text{CoSn(OH)}_6$  and  $\text{Sn-Co@C}$  nanoparticles were performed by X-ray photoelectron spectroscopy (XPS, Thermo Scientific K-Alpha). The appropriate calcination temperature of  $\text{Sn-Co@C}$  nanoparticles was determined via thermogravimetric analysis under air atmosphere (TGA, SDT-Q600). Raman spectra were acquired utilizing LabRAM HR800 (HORIBA Jobin Yvon). And pore structure information was collected via nitrogen adsorption/desorption using a JWGB volumetric gas adsorption apparatus at 77 K.

**Electrochemical measurement:** CR2016 coin cells were assembled with Li foils, Celgard separator and the above-mentioned  $\text{Sn-Co@C}$  disks or commercial Cu foil in Ar-filled glovebox (water and oxygen content:  $<0.1$  ppm). 1 M bis(trifluoromethane) sulfonamide lithium salt ( $\text{LiTFSI}$ ) and solvent of 1, 3-dioxolane (DOL) and 1, 2-dimethoxyethane (DME) (v/v, 1:1) with 2wt%  $\text{LiNO}_3$  additive as electrolyte were added to test cells. To evaluate the CE, metallic Li ( $1 \text{ mAh cm}^{-2}$ ) was plated on different current collectors at  $1 \text{ mA cm}^{-2}$  and stripped away for charging to 1 V. To investigate the symmetric cells, working electrodes were prepared by first electroplating  $5 \text{ mA h cm}^{-2}$  Li metal at  $0.5 \text{ mA cm}^{-2}$ , and then cycling at different current density and capacity. For testing the performance of full cells,  $5 \text{ mAh cm}^{-2}$  of Li was pre-deposited on the disks as the anode, which paired with  $\text{LiFePO}_4$  (LFP) cathode (loading of the active material was about  $8\sim9 \text{ mg cm}^{-2}$ ). The cathode was prepared by mixing LFP powder (80 wt %), polyvinylidene fluoride binder (PVDF) (10 wt %) and super P (10 wt %) with mass ratio of 8:1:1. These full cells were galvanostatically cycled between 2.5 and 4 V ( $1\text{C}=170 \text{ mA g}^{-1}$ ).

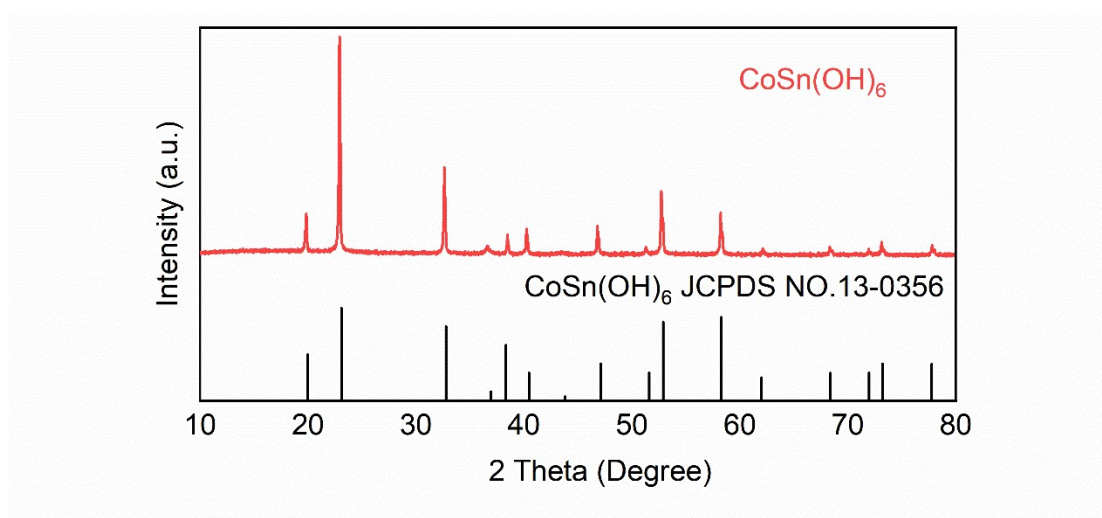

Fig. S1. The XRD pattern of  $\text{CoSn(OH)}_6$  precursor.

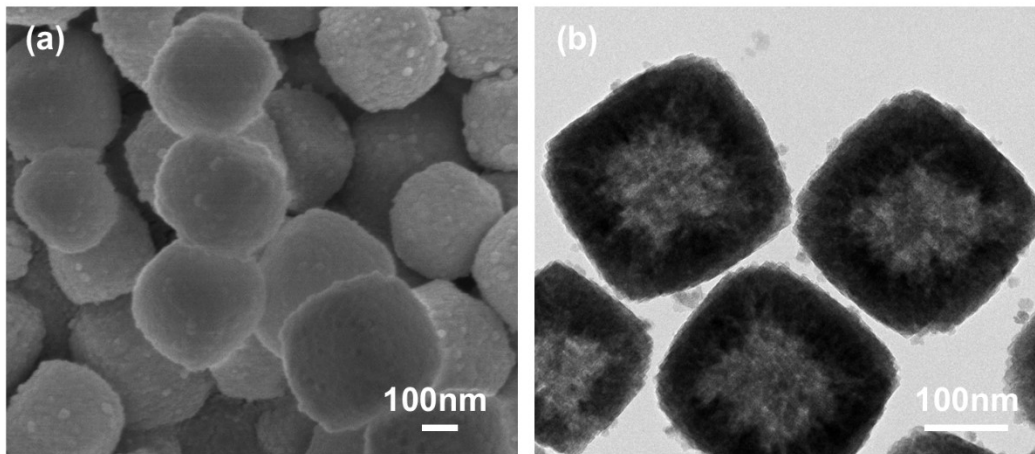

Fig. S2. (a) SEM and (b)TEM images of hollow  $\text{CoSn(OH)}_6$  nanocubes.

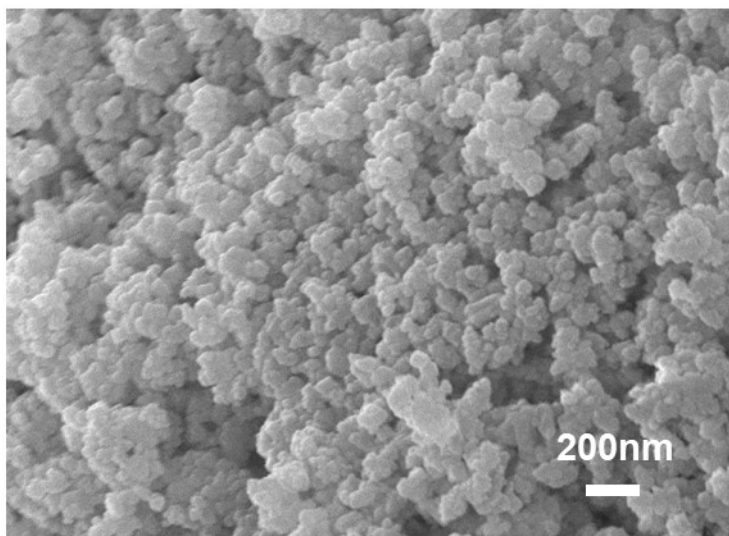

Fig. S3. SEM image of bare Sn-Co alloy.

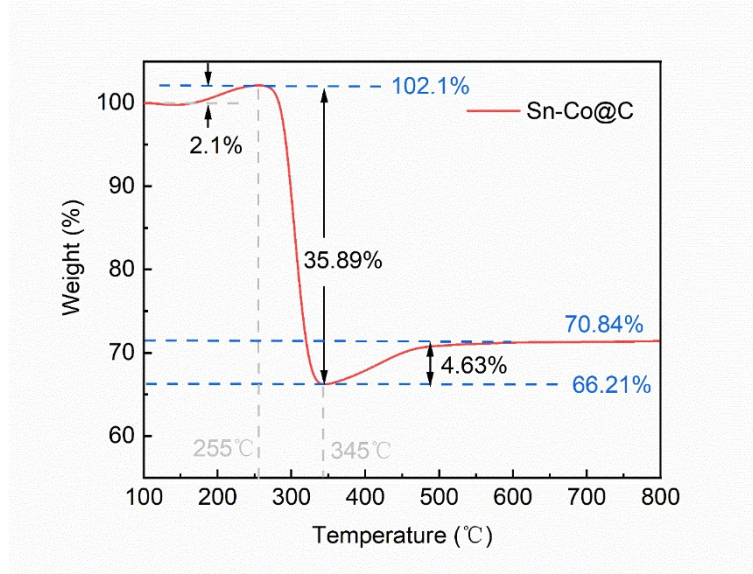

Fig. S4. TGA curves of Sn-Co@C sample.

According to the principle of mass conservation, the Sn-Co alloy component is eventually oxidized to  $\text{SnO}_2$  and  $\text{Co}_3\text{O}_4$  in air. The Sn-Co content can be roughly calculated as 51.82% according to the following equation, so the material carbon content is 48.18%.

$$\text{Sn - Co wt\%} = \frac{m_1}{M_{(\text{SnO}_2)} + \frac{1}{3}M_{(\text{Co}_3\text{O}_4)}} \times \frac{M_{(\text{Sn - Co})}}{m_0}$$

$m_0 = 3.6983\text{mg}$  (mass weight of sample at 160°C after water removal)

$m_1 = 2.6461\text{mg}$  (mass sample weight after TGA analysis)

$M(\text{SnO}_2) = 150.7\text{ g mol}^{-1}$  (molecular weight of  $\text{SnO}_2$ )

$M(\text{Co}_3\text{O}_4) = 284\text{ g mol}^{-1}$  (molecular weight of  $\text{Co}_3\text{O}_4$ )

$M(\text{Sn-Co}) = 177.7\text{ g mol}^{-1}$  (molecular weight of Sn-Co)

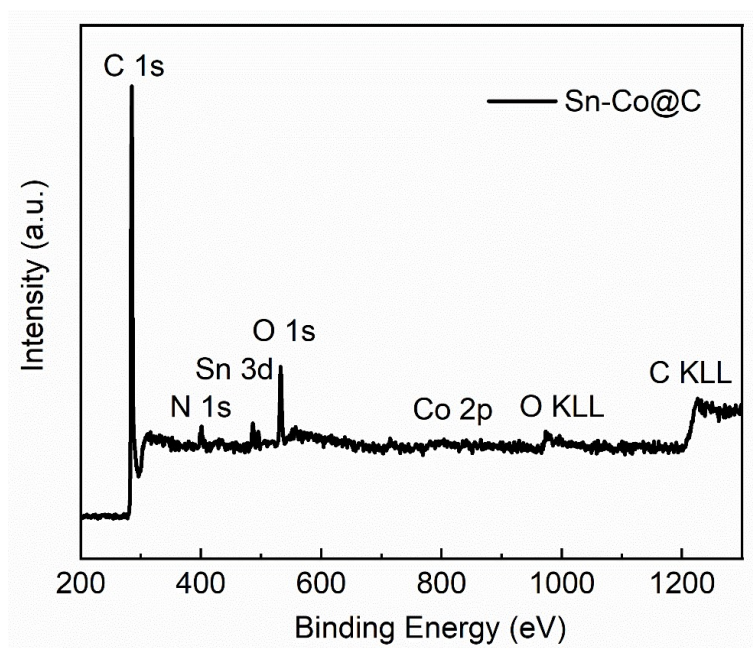

Fig. S5. Survey XPS spectra of Sn-Co@C sample.



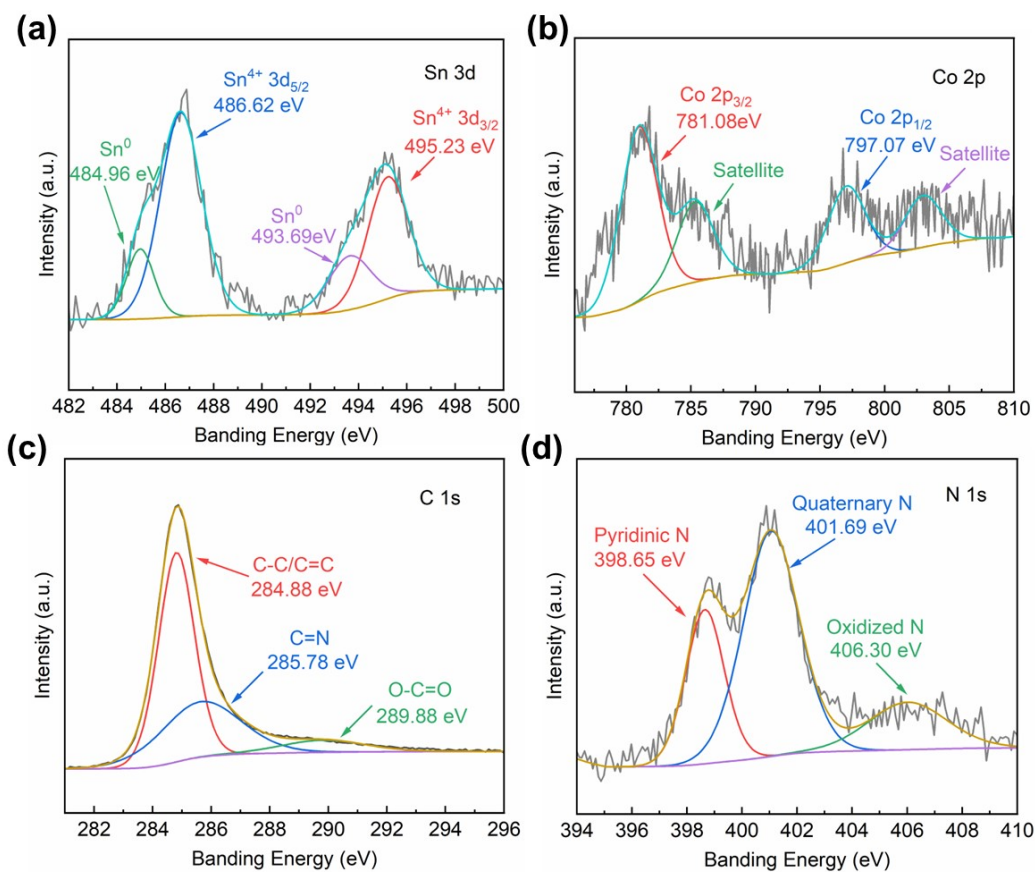

Fig. S6. High-resolution XPS spectra of Sn 3d (a), Co 2p (b), C 1s (c) and N 1s (d) of Sn-Co@C.

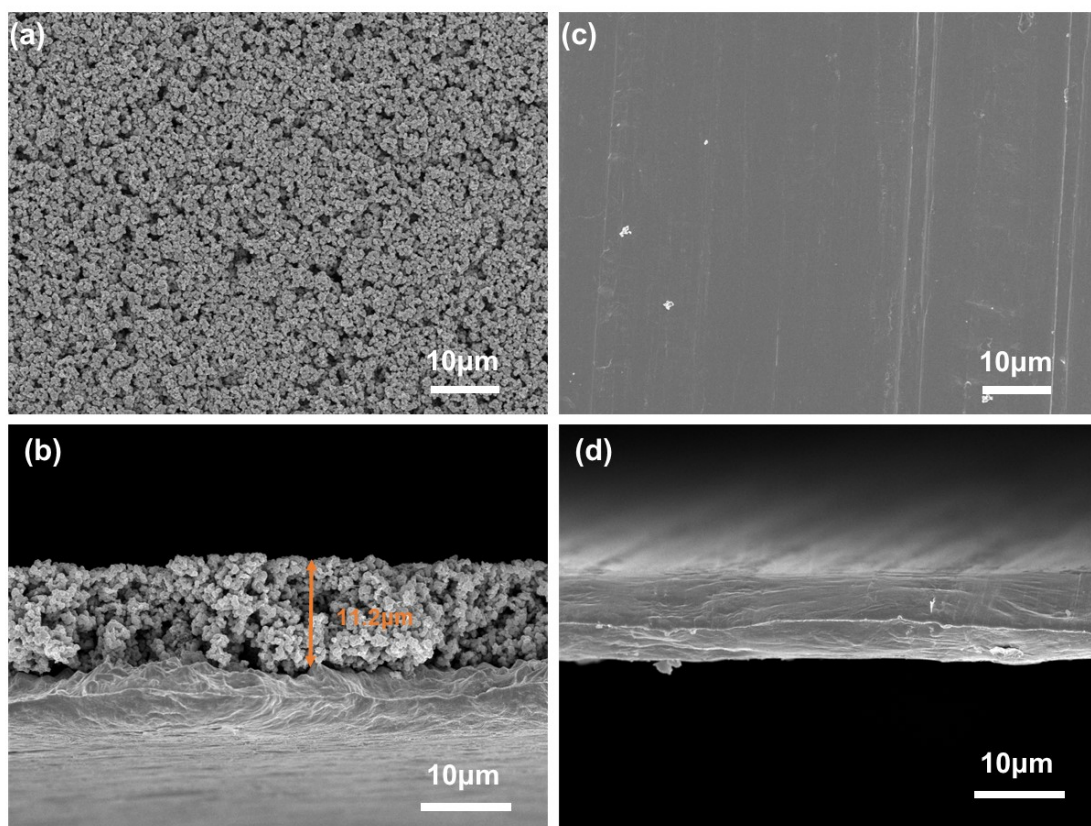

Fig. S7. (a, b) The SEM images of surface and cross-sectional morphologies Sn-Co@C current collector. (c, d) The SEM images of surface and cross-sectional morphologies bare Cu current collector.

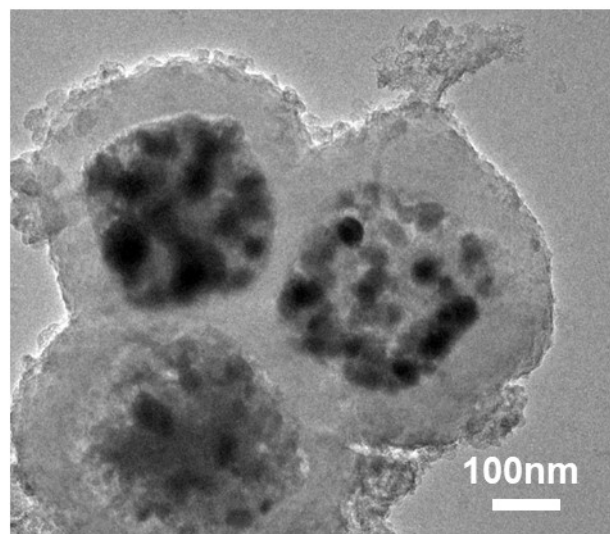

Fig. S8. TEM image of Sn-Co@C nanoparticles after 10 cycles at  $1 \text{ mA cm}^{-2}$  and  $1 \text{ mAh cm}^{-2}$ .

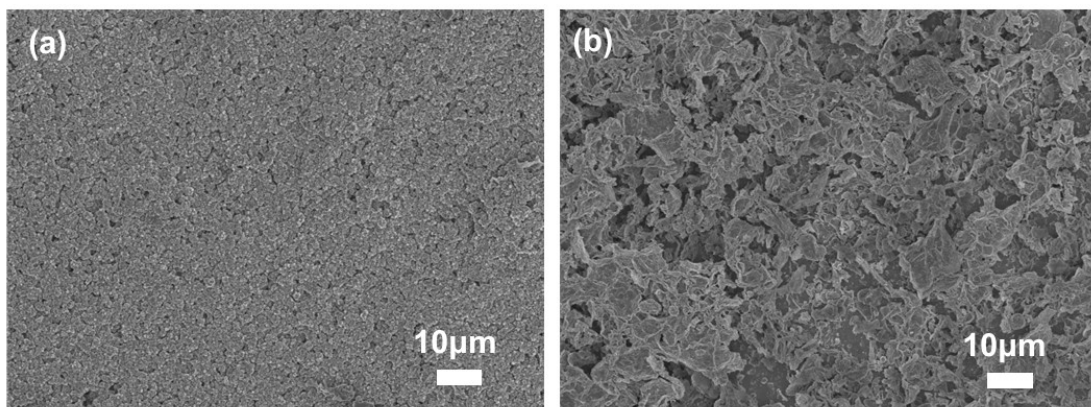

Fig. S9. The SEM images of stripping-state Sn-Co@C (a) and bare Cu (b) current after 10 cycles at  $1 \text{ mA cm}^{-2}$ ,  $1 \text{ mAh cm}^{-2}$ .

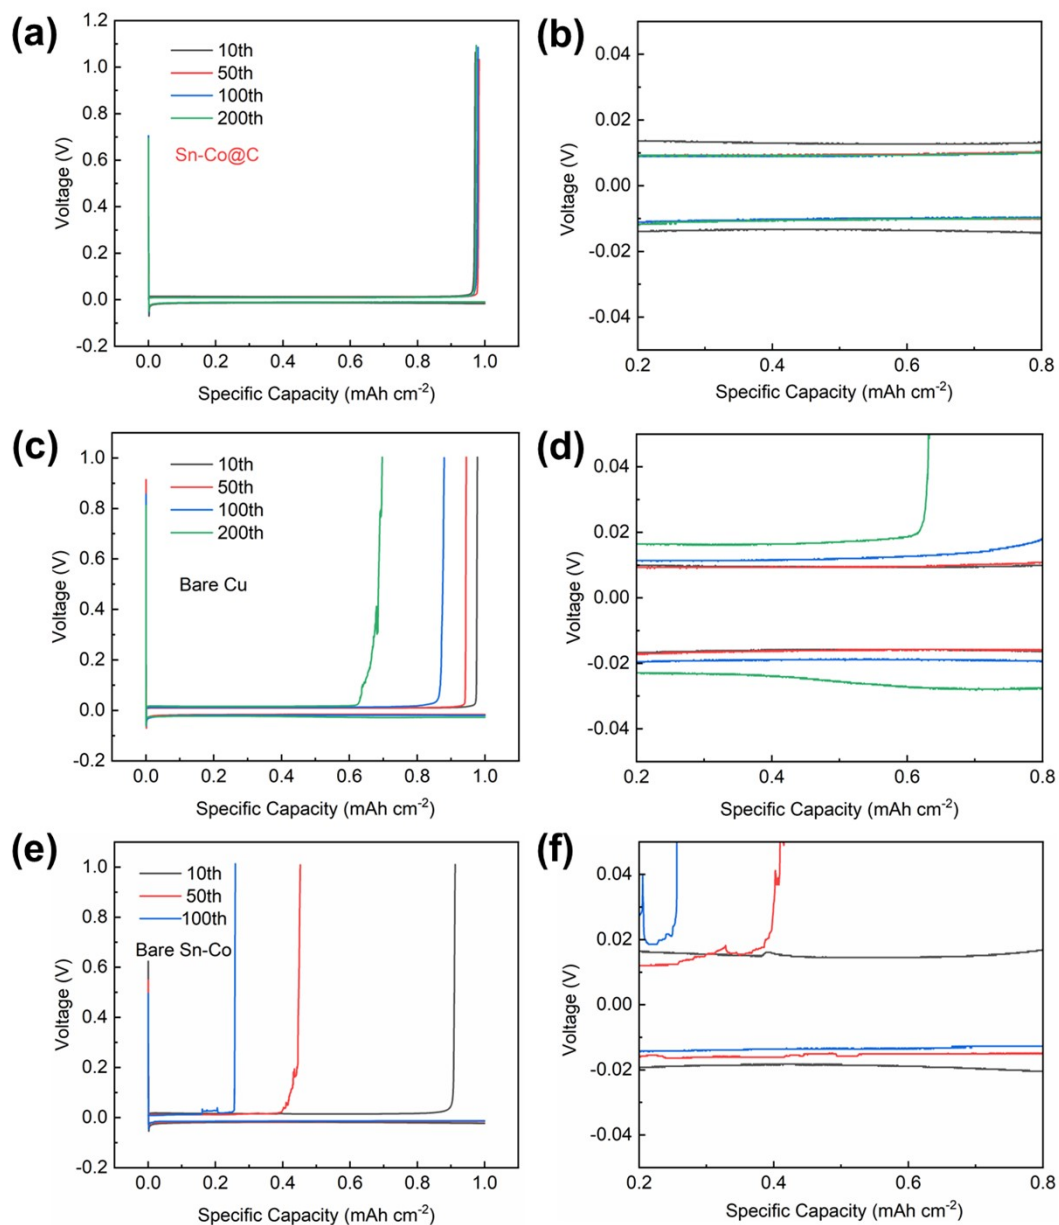

Fig. S10. The enlarged voltage profiles of Sn-Co@C (a,b), bare Cu (c, d) and bare Sn-Co (e, f) during Li cycling at the condition of  $1 \text{ mA cm}^{-2}$  and  $1 \text{ mAh cm}^{-2}$ .

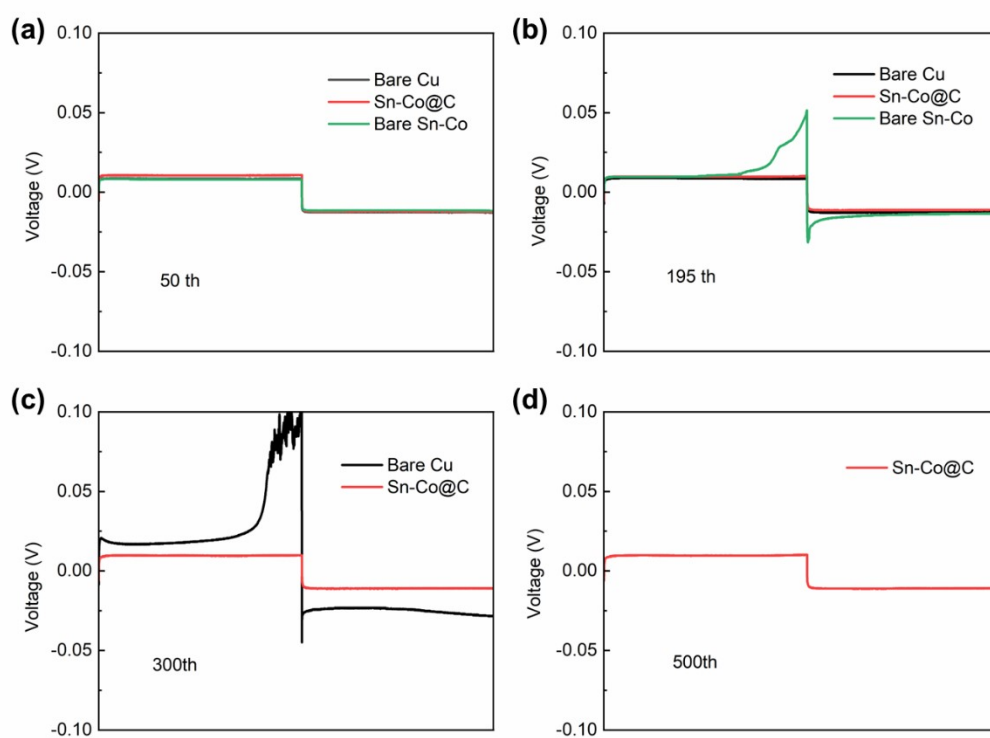

Fig. S11. The enlarged voltage profiles of bare Cu, bare Sn-Co and Sn-Co@C-based symmetrical cells at  $1 \text{ mA cm}^{-2}$  and  $1 \text{ mAh cm}^{-2}$  for 50th (a), 195th (b), 300th (c), 500th (d).

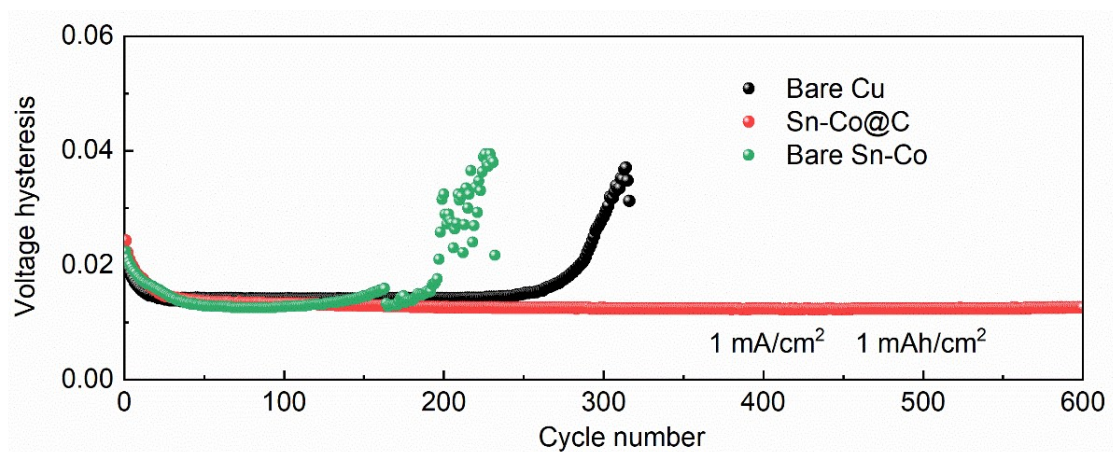

Fig. S12. The voltage hysteresis comparison of bare Cu, bare Sn-Co and Sn-Co@C-based symmetric cells under the conditions of  $1 \text{ mA cm}^{-2}$  and  $1 \text{ mAh cm}^{-2}$ .

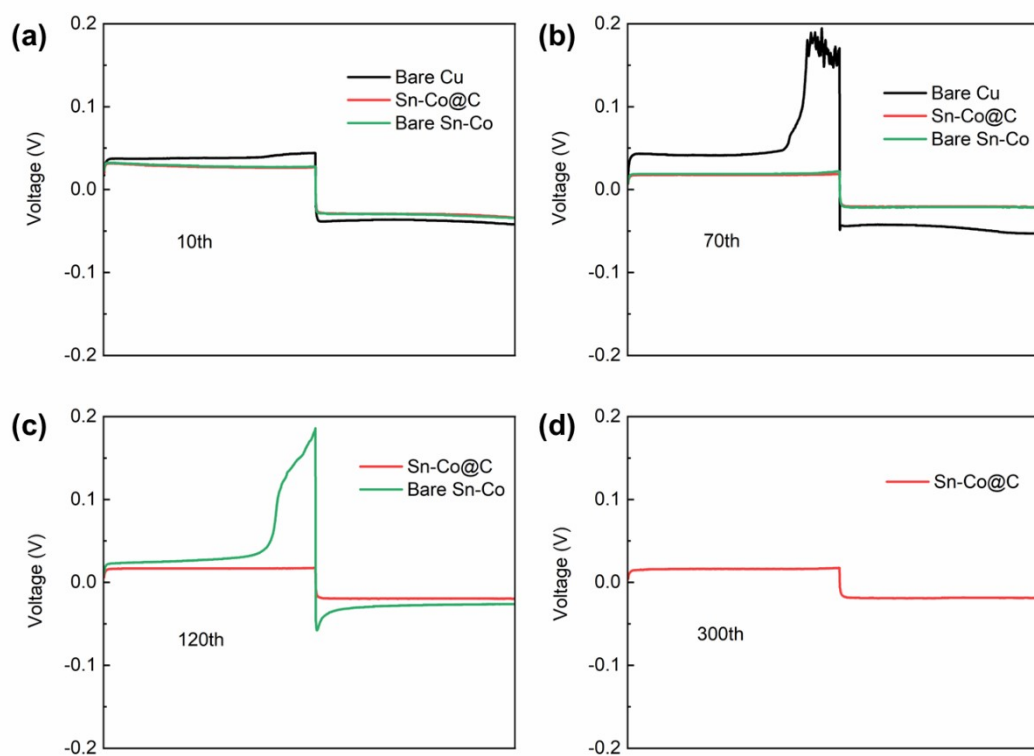

Fig. S13. The enlarged voltage profiles of bare Cu, bare Sn-Co and Sn-Co@C-based symmetrical cells at  $5 \text{ mA cm}^{-2}$  and  $1 \text{ mAh cm}^{-2}$  for 10th (a), 70th (b), 120th (c), 300th (d).



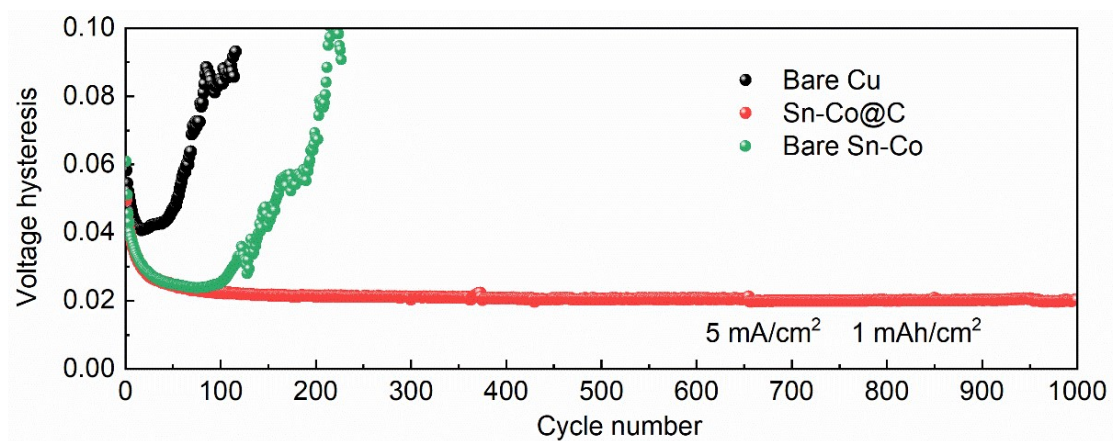

Fig. S14. The voltage hysteresis comparison of bare Cu, bare Sn-Co and Sn-Co@C-based symmetric cells under the conditions of  $5 \text{ mA cm}^{-2}$  and  $1 \text{ mAh cm}^{-2}$ .

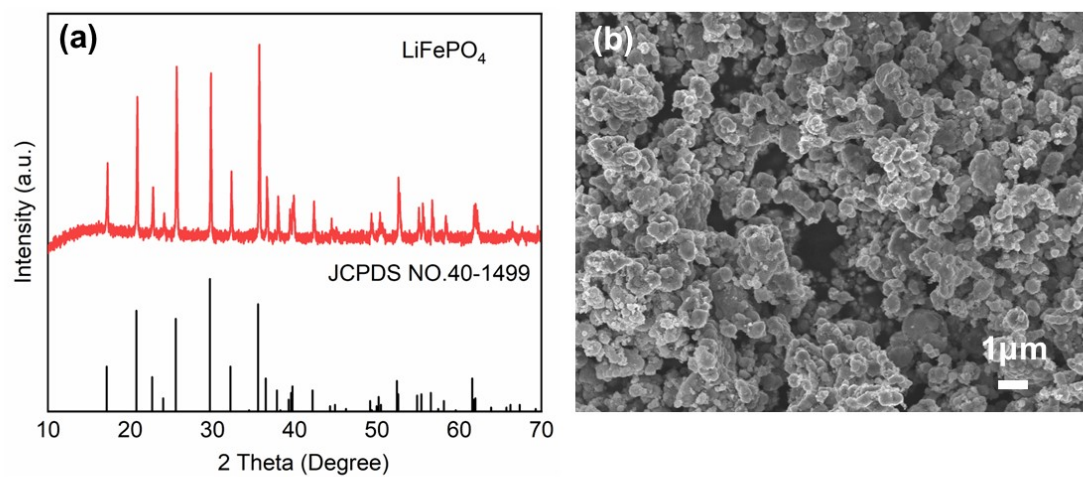

Fig. S15. The XRD pattern (a) and SEM image (b) of LiFePO<sub>4</sub>.

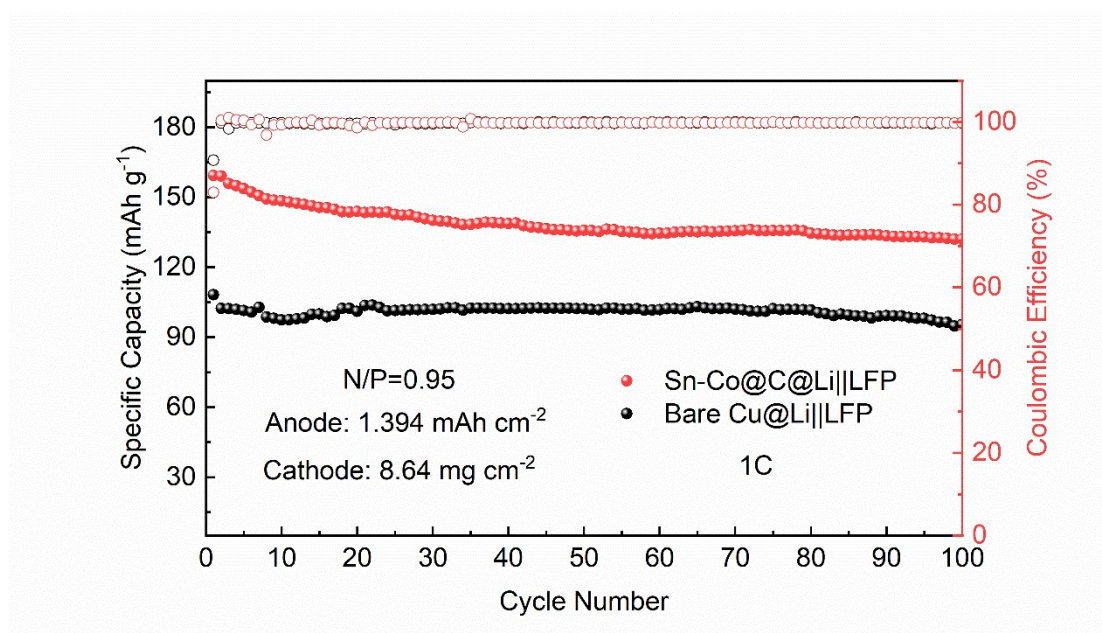

Fig. S16. Cycling performance of bare Cu@Li||LFP and Sn-Co@C@Li||LFP full cells at 1C.

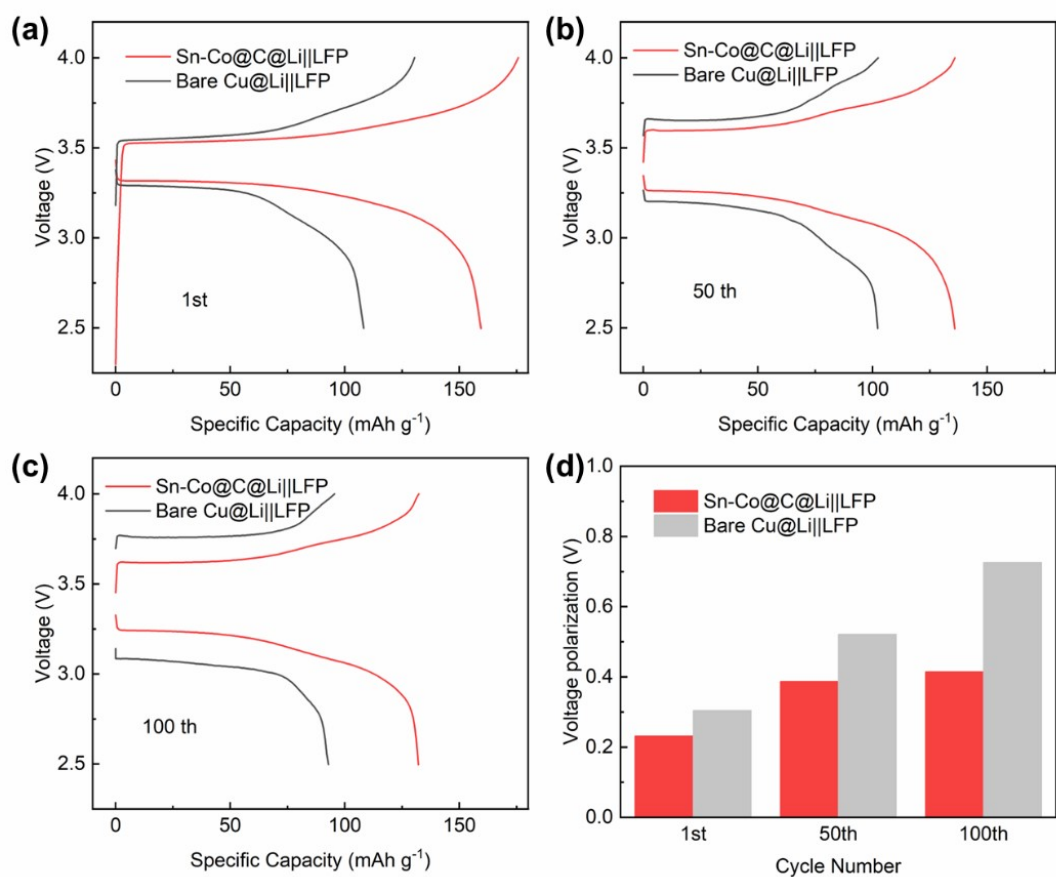

Fig. S17 Specific capacity-voltage profiles for 1st (a), 50th (b), 100th (c), and voltage polarization comparison (d) at 1C rate of bare Cu@Li||LFP and Sn-Co@C@Li||LFP full cells.

Table S1. Comparison of long-term cycling in symmetrical cells of different electrodes.

| Materials                         | Test condition                                     | Time (h)     | Ref.             |
|-----------------------------------|----------------------------------------------------|--------------|------------------|
| CNT@SiO <sub>x</sub> -C.          | 1 mA cm <sup>-2</sup> , 1 mAh cm <sup>-2</sup>     | 950h         | [1]              |
| CuS/Cu <sub>2</sub> S@Cu          | 1 mA cm <sup>-2</sup> , 1 mAh cm <sup>-2</sup>     | 880h         | [2]              |
| Dual-gradient Cu-Au-ZnO-PAN-ZnO   | 1 mA cm <sup>-2</sup> , 1 mAh cm <sup>-2</sup>     | 600h         | [3]              |
| 3D Cu current collectors          | 1 mA cm <sup>-2</sup> , 1 mAh cm <sup>-2</sup>     | 400h         | [4]              |
| Ni-Co hollow prisms@carbon fibers | 1 mA cm <sup>-2</sup> , 1 mAh cm <sup>-2</sup>     | 1200h        | [5]              |
| Co nanoparticles in N-graphene    | 1 mA cm <sup>-2</sup> , 1 mAh cm <sup>-2</sup>     | 1000h        | [6]              |
| Zn@N-doped built on carbon cloth  | 1 mA cm <sup>-2</sup> , 1 mAh cm <sup>-2</sup>     | 1200h        | [7]              |
| N-doped CNTs/Ni foam              | 1 mA cm <sup>-2</sup> , 1 mAh cm <sup>-2</sup>     | 1000h        | [8]              |
| Au carbon fabric                  | 1 mA cm <sup>-2</sup> , 1 mAh cm <sup>-2</sup>     | 630h         | [9]              |
| Carbon cloth with SiC whiskers    | 1 mA cm <sup>-2</sup> , 1 mAh cm <sup>-2</sup>     | 1000h        | [10]             |
| <b>Sn-Co@C</b>                    | <b>1 mA cm<sup>-2</sup>, 1 mAh cm<sup>-2</sup></b> | <b>1350h</b> | <b>This work</b> |
|                                   | <b>5 mA cm<sup>-2</sup>, 1 mAh cm<sup>-2</sup></b> | <b>400h</b>  |                  |

Table S2. Comparison of long-term cycling in full cells of different anodes.

| Modified anode materials          | Test condition       | N/P         | Cycles     | Ref.             |
|-----------------------------------|----------------------|-------------|------------|------------------|
| CuS/Cu <sub>2</sub> S@Cu          | 1C                   | 5.2         | 200        | [2]              |
| Ag-N-doped carbon nanoflake       | 1C                   | /           | 70         | [11]             |
| 3D porous nitrogen doped carbon   | 50 mAg <sup>-1</sup> | /           | 50         | [12]             |
| Ni-Co hollow prisms@carbon fibers | 1C                   | 6           | 150        | [5]              |
| Co nanoparticles in N-graphene    | 1C                   | /           | 100        | [6]              |
| Zn@N-doped built on carbon cloth  | 1C                   | 5.2         | 160        | [7]              |
| Au carbon fabric                  | 0.5C                 | /           | 145        | [9]              |
| carbon cloth with SiC whiskers    | 0.5C                 | 4.4         | 120        | [10]             |
| <b>Sn-Co@C</b>                    | <b>1C</b>            | <b>2.12</b> | <b>250</b> | <b>This work</b> |

## References

- [1] Z. Lu, S. Liu, C. Li, J. Huang, D. Wu, R. Fu, *Chem. Commun.* **2019**, 55, 6034.
- [2] K. Lin, T. Li, S.-W. Chiang, M. Liu, X. Qin, X. Xu, L. Zhang, F. Kang, G. Chen, B. Li, *Small* **2020**, 16, 2001784.
- [3] H. Zheng, Q. Zhang, Q. Chen, W. Xu, Q. Xie, Y. Cai, Y. Ma, Z. Qiao, Q. Luo, J. Lin, L. Wang, B. Qu, B. Sa, D.-L. Peng, *J. Mater. Chem. A* **2020**, 8, 313.
- [4] H. Zhao, D. Lei, Y.-B. He, Y. Yuan, Q. Yun, B. Ni, W. Lv, B. Li, Q.-H. Yang, F. Kang, J. Lu, *Adv. Energy Mater.* **2018**, 8, 1800266.
- [5] C. Chen, J. Guan, N. W. Li, Y. Lu, D. Luan, C. H. Zhang, G. Cheng, L. Yu, X. W. Lou, *Adv. Mater.* **2021**, 33, 2100608.
- [6] T.-S. Wang, X. Liu, X. Zhao, P. He, C.-W. Nan, L.-Z. Fan, *Adv. Funct. Mater.* **2020**, 30, 2000786.
- [7] L. You, S. Ju, J. Liu, G. Xia, Z. Guo, X. Yu, *J. Energy Chem.* **2022**, 65, 439.
- [8] Z. Zhang, J. Wang, X. Yan, S. Zhang, W. Yang, Z. Zhuang, W.-Q. Han, *Energy Storage Mater.* **2020**, 29, 332.
- [9] D. Li, Y. Gao, C. Xie, Z. Zheng, *Appl. Phys. Rev.* **2022**, 9, 011424.
- [10] B. Sun, Q. Zhang, W. Xu, R. Zhao, H. Zhu, W. Lv, X. Li, N. Yang, *Nano Energy* **2022**, 94, 106937.
- [11] Q. Sun, W. Zhai, G. Hou, J. Feng, L. Zhang, P. Si, S. Guo, L. Ci, *ACS Sustain. Chem. Eng.* **2018**, 6, 15219.
- [12] A. Patrike, K. Suresh, M. Wahid, V. Chaturvedi, M. V. Shelke, *Carbon* **2021**, 179, 256.
